# Supplementary material
Source: PubMed Central journal article supplement (PMC6731434)
Supplement: ajtr0011-5076-f5.pdf [file ajtr0011-5076-f5.pdf]

apoE receptor mimetics reduce neuroinflammation

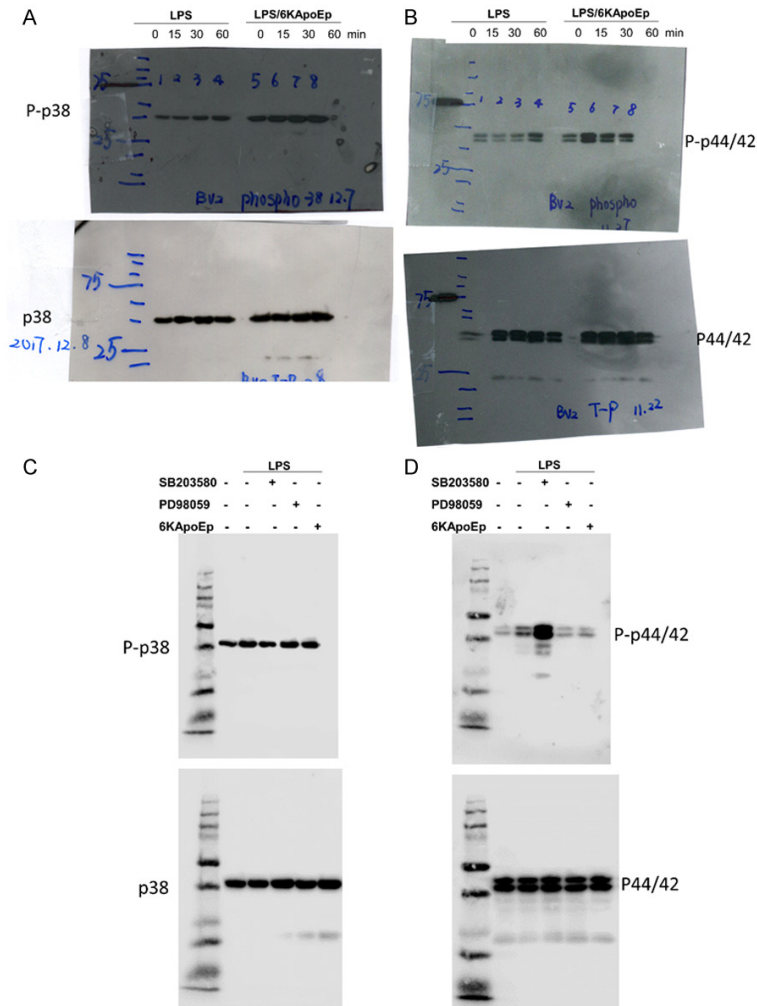

**Figure S1.** 6KApoEp attenuates LPS-induced p44/42 MAPK phosphorylation. Original images of Western blots showing total (p38 and p44/42) and phosphorylated p38 and p44/42 MAPK (P-p38 and P-p44/42) in BV2 cells after treatment with LPS at 100 ng/ml for 0-60 min in the absence or presence of 6KApoEp (A, B). Also shown are original images for total and phosphorylated p38 and p44/42 MAPK after pretreatment with SB203580, PD98059 or 6KApoEp for 60 min followed by treatment with LPS at 100 ng/ml (C, D).

# apoE receptor mimetics reduce neuroinflammation

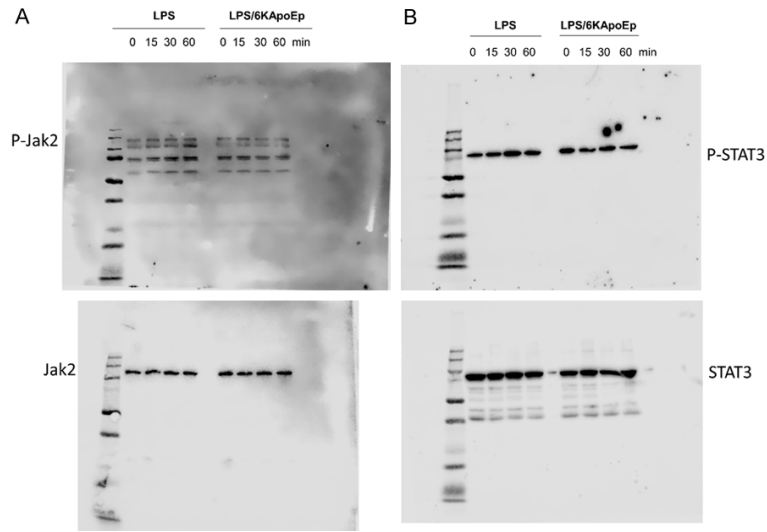

**Figure S2.** 6KApoEp attenuates LPS-induced JAK2 and STAT3 phosphorylation. Original images of Western blots showing total (JAK2 and STAT3) and phosphorylated JAK2 and STAT3 (p-JAK2 and p-STAT3) in BV2 cells after treatment with LPS at 100 ng/ml for 0-60 min in the absence or presence of 6KApoEp.
